# Supplementary material
Source: publisher site journal article supplement (https://www.dovepress.com/article/455987)
Supplement: Supplementary file 1 [file get_supplementary_file.php]

Supplement 1 (which is to be considered for on-line only publication)

**The In-/ Ex-clusion criteria were as follows:**

Inclusion criteria: (1) ages between 60 and 75 years old (including 60 and 75 years old); (2) with American Society of Anesthesiologists (ASA) classification I-III; (3) the operation time is more than 4 hours; (4) general anesthesia without other combined anesthesia methods; (5) underwent conventional laparotomy; (6) patients with good compliance and are willing to cooperate with follow-up.

Exclusion criteria: (1) with pheochromocytoma; (2) patients who cannot cooperate during the study; (3) patients participated in other clinical trials; (4) patients with severe heart block and (or) severe ventricular insufficiency; (5) with serious heart, lung, kidney disease preoperatively as follows: ① with New York Heart Association (NYHA) ≥III; ②with eGFR < 60 ml/min/1.73 m2; ③with a history of chronic obstructive pulmonary disease (COPD), asthma, and (or) coexisting preoperative pulmonary infection; ④the oxygen saturation is below 95 when inhaling air under a calm state preoperatively; ⑤with coagulation disorders that cannot be corrected; ⑥requiring intermittent dialysis treatment.

**The generation of the random number table**

Excel software for Mac (16.54 version, Microsoft Corporation, USA) was used to generate a random number table. The detailed steps were as follows:

(1). In sheet 1, the random function ("=RAND()*100+16") was used to generate 86 random numbers which had been rounded down to get 86 random integers.

(2). Those 86 random integers in step 1 were copied to sheet 2 and sheet 3, and a random number table was formed by these 86 random integers in sheet 2.

(3). The same 86 random integers in sheet 3 were sorted in ascending order. The first 43 numbers corresponded to the Control group, and the last 43 numbers corresponded to the Dex group accordingly. Finally, every 86 random integers was matched with the corresponding group and these 86 random integers were made into a card and put in an obscure envelope which had been sealed subsequently.
